# Supplementary material for: Identification of Novel tet(X3) Variants Resistant To Tigecycline in Acinetobacter Species
Source: PubMed Central journal article supplement (PMC9784759; doi:10.1128/spectrum.01333-22), 2022-11-21
Supplement: spectrum.01333-22-s0001.pdf [file spectrum.01333-22-s0001.pdf]

## Supplementary file

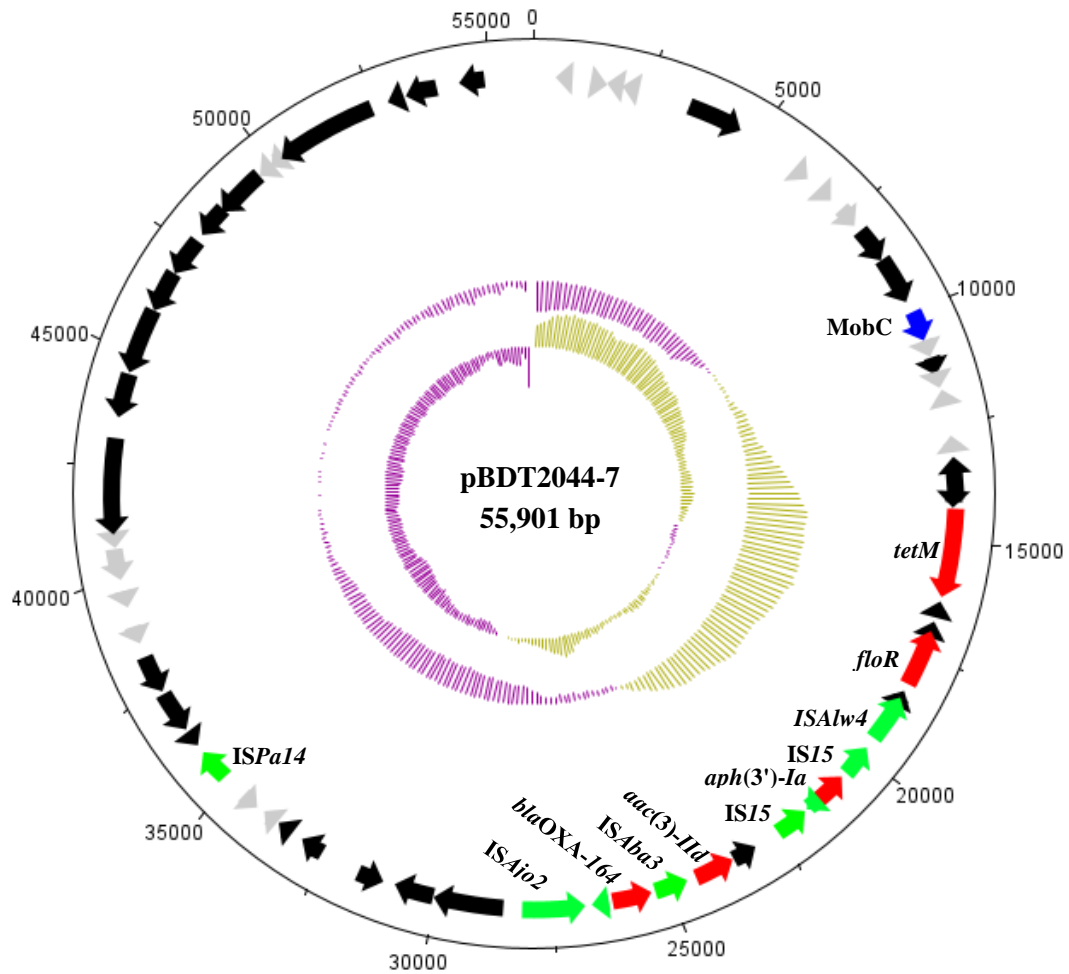

- 1 Figure S1. Structure of the index plasmid pBDT2044-7. GC skew and GC content are indicated
- 2 from the inside out. Positions and transcriptional directions of the predicted ORFs are denoted with
- 3 arrows. Genes associated with the antimicrobial resistance, mobile element, plasmid mobilization
- 4 relaxosome protein, other protein and hypothetical protein are highlighted in red, green, blue, black
- 5 and gray, respectively.

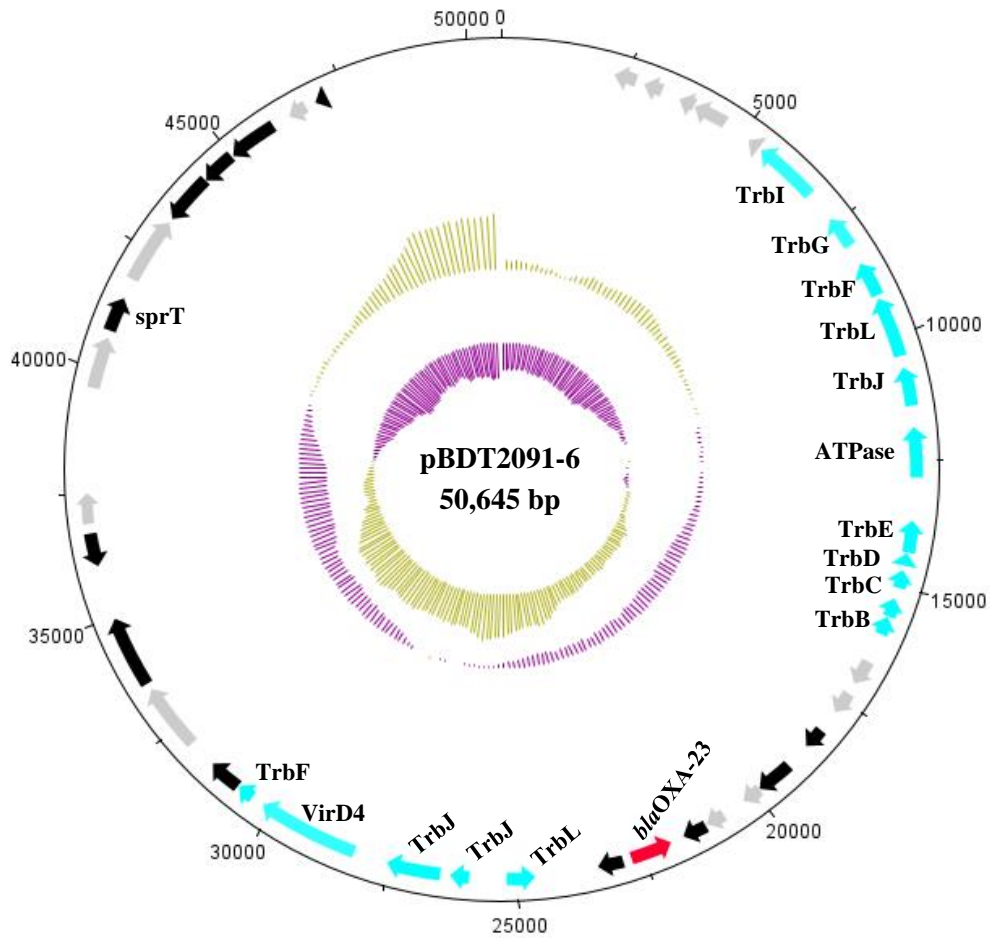

6 Figure S2. Structure of the conjugative plasmid pBDT2091-6. GC skew and GC content are  
7 indicated from the inside out. Positions and transcriptional directions of the predicted ORFs are  
8 denoted with arrows. Genes associated with the antimicrobial resistance, conjugative transfer  
9 protein, other protein and hypothetical protein are highlighted in red, azure, black and gray,  
10 respectively.

Table S1. Primers used in this study.

| Primer designation        | Sequence (5'-3')                     | Annealingtem (°C) | Product size(bp) |
|---------------------------|--------------------------------------|-------------------|------------------|
| <i>tet(X3)</i> -F         | ATGACAATGCGAATAGATAC                 | 58.0              | 1167             |
| <i>tet(X3)</i> -R         | TTATAGATTCAATAATTTTGGAAAC            |                   |                  |
| 16S rRNA-F                | AGAGTTTGATCCTGGCTCAG                 | 55.0              | 1400             |
| 16S rRNA-R                | GGTACCTTGTACGACTT                    |                   |                  |
| <i>tet(X3)</i> -inverse-F | CGACAGAAAACGAAACCGAA                 | 57.5              | 5117             |
| <i>tet(X3)</i> -inverse R | TTCTTGCCTCTCGGTCGTTG                 |                   |                  |
| <i>tet(X3)</i> -EcoRI-F   | TACGCGAATTCCGTATAGAACAGTCAAAAGG      | 58.0              | 1896             |
| <i>tet(X3)</i> -XbaII-R   | TACGCTCTAGAGGCTCCTTTGGGCATACTC       |                   |                  |
| pro-EcoRI-F               | TACGCGAATTCTAAGAACATACTTTATGG        | 49.0              | 522              |
| pro-XbaII-R               | TACGCTCTAGATCAAAAATGGCACATAACAA      |                   |                  |
| Gene-SalI-F               | TACGCGTCGACATGACAATGCGAATAGATAC      | 56.0              | 1189             |
| Gene-HindIII-R            | TACGCAAGCTTTTATAGATTCAATAATTTTGGAAAC |                   |                  |
